# Supplementary material
Source: PubMed Central journal article supplement (PMC5919883)
Supplement: jci-128-96791-s001.pdf [file jci-128-96791-s001.pdf]

## Supplementary figures

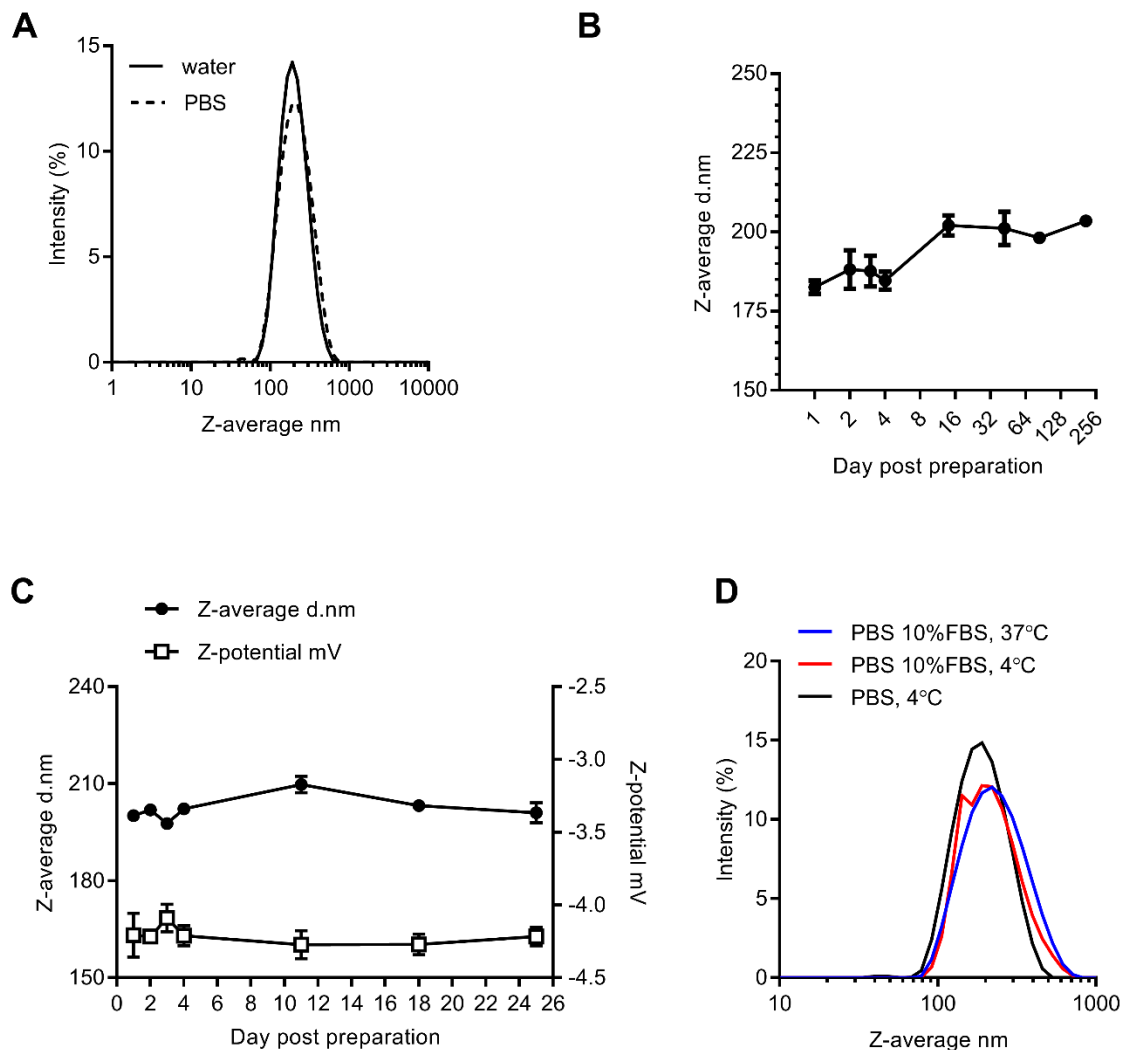

### Supp. figure 1. TNE characteristics

(A) Particle size distribution of OVA-Clec9A-TNE diluted in water and PBS; (B) OVA-Clec9A-TNE were stored at 4 °C for over 256 days. Aliquots were removed periodically and diluted 1:100 in PBS for size measurement. (C) OVA-WH-TNE were diluted 1:100 in PBS containing 10% FBS and stored at 4 °C. Aliquots were removed periodically for size and zeta potential measurements. Data represent mean of three individual measurements with SD. (D) OVA-WH-TNE were diluted 1:100 in PBS or PBS containing 10% FBS and stored at 4 °C, or diluted 1:100 in PBS containing 10% FBS and incubated at 37 °C. Sixteen hours later, aliquots were removed for size measurements. Data represent mean of three individual measurements.

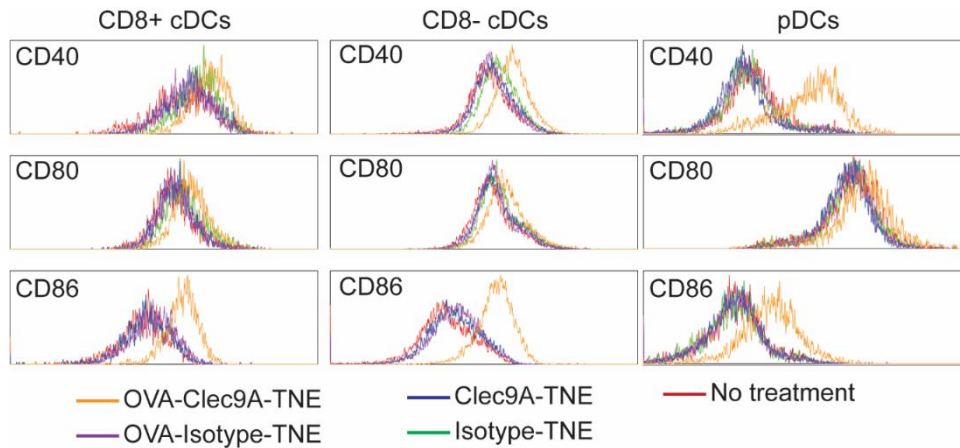

**Supp. figure 2. OVA delivered by Clec9A-TNE promote DC activation.**

C57Bl/6 mice were injected i.v. with OVA-Clec9A-TNE, OVA-Isotype-TNE, Clec9A-TNE, or Isotype-TNE. Six hours later, surface expression of CD86, CD80 and CD40 by CD8+ DCs, CD8- DCs and pDCs was analyzed by flow cytometry. Representative histogram from two separated experiments are shown (n=6).

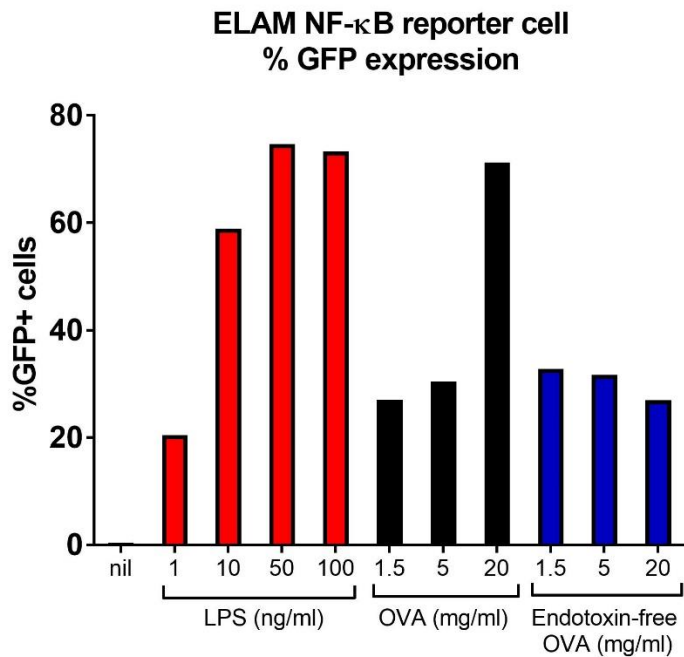

**Supp figure 3. OVA but not endotoxin-free OVA induces NF- $\kappa$ B transcriptional activity.**

Detoxi-Gel Endotoxin Removal Gel (Thermo Scientific) was used to remove endotoxin from Ovalbumin (OVA, Sigma-Aldrich). RAW 264.7 mouse macrophages stably transfected with the endothelial cell-leukocyte adhesion molecule (ELAM) promoter controlling expression of

green fluorescence protein (GFP)-NF- $\kappa$ B were cultured with either medium (nil), OVA, endotoxin-depleted OVA or LPS (*E.coli* Serotype O111:B4, Enzo) at the indicated concentrations for 4 hours. Cells were washed, stained with Live/Dead Fixable Near-IR Dead Cell Stain then analyzed for GFP positive live cells.

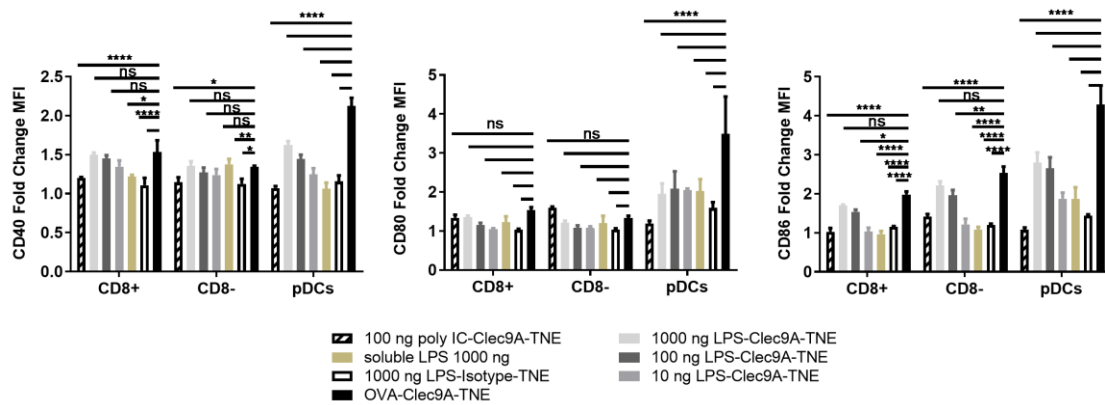

**Supp. figure 4. Clec9A-TNE encapsulating poly I:C or LPS in the absence of antigen activated DCs much less effectively than OVA-Clec9A-TNE.**

C57Bl/6 mice were injected i.v. at the indicated dosage of poly IC-Clec9A-TNE, LPS-Clec9A-TNE or LPS-Isotype-TNE. Six hours later, surface expression of CD86, CD80 and CD40 by CD8+ DCs, CD8- DCs and pDCs was analyzed by flow cytometry (n=3).

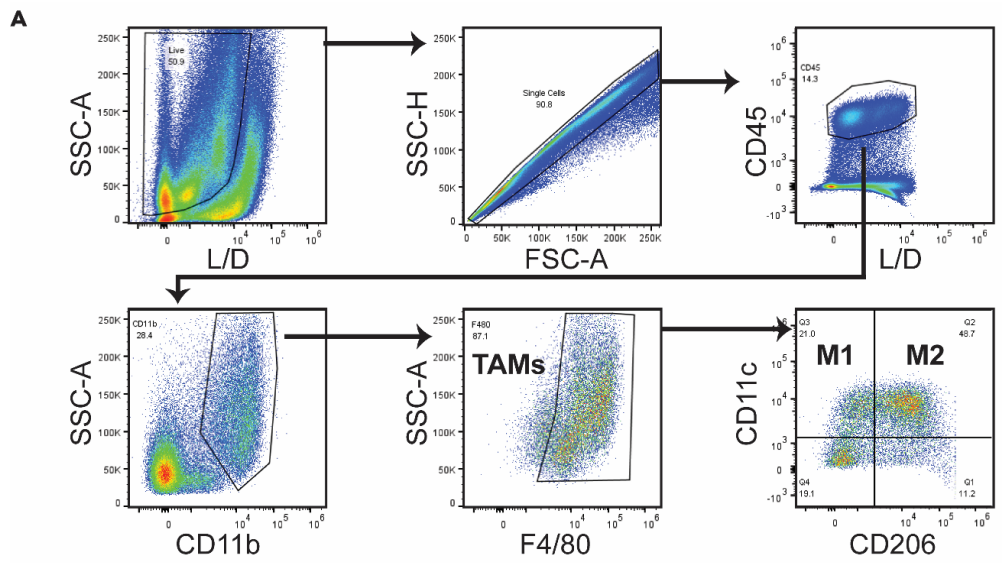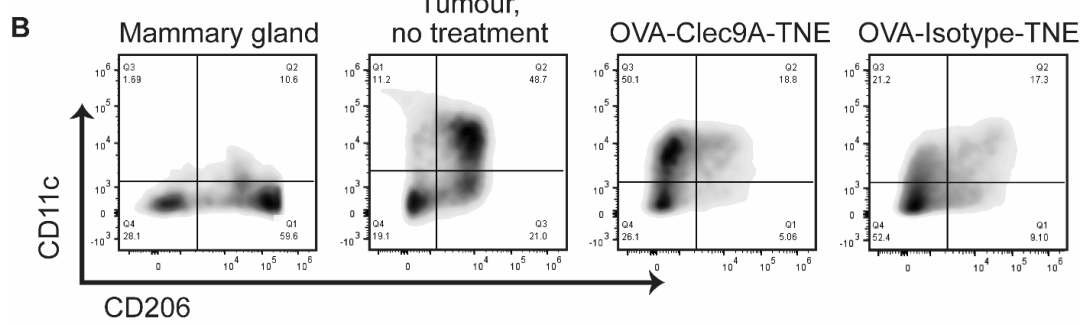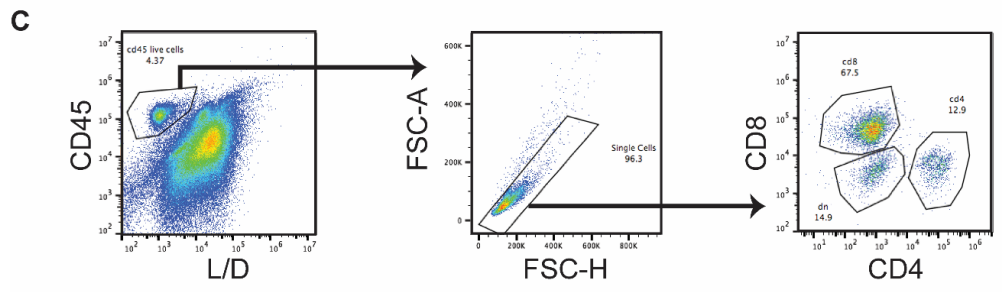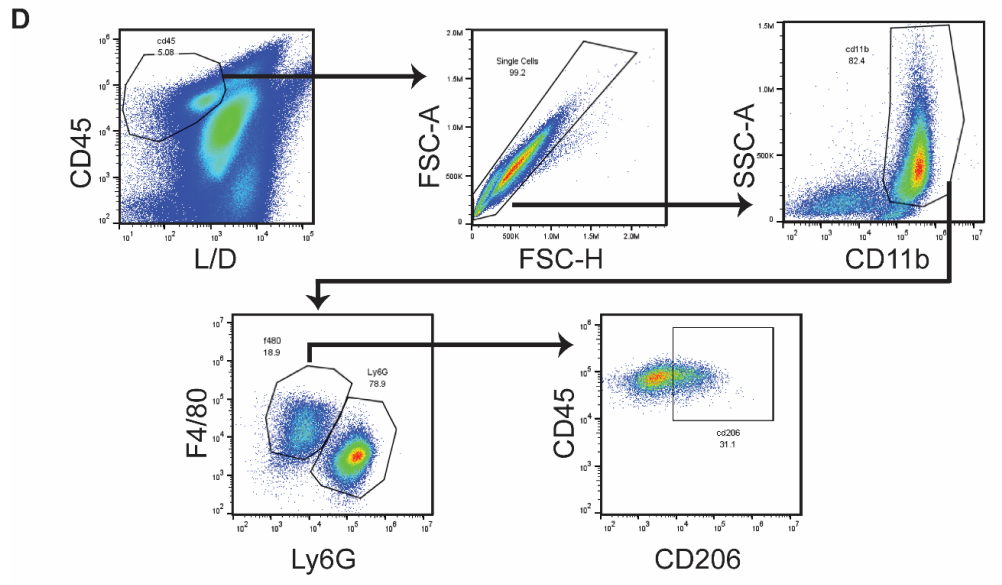

**Supp. figure 5. Gating strategies for flow cytometry analysis.**

(A) Representative gating strategy for tumor myeloid cells of C57BL/6 mice developing tumor after orthotopic injection of PyMT-mChOVA. This gating strategy was used in Figure 4b. (B) Representative cytogram showing M1 and M2 macrophage populations in the mammary gland of naïve C57BL/6, or PyMT-mChOVA tumor-bearing mice receiving OVA-Clec9A-TNE, or OVA-Isotype-TNE or left untreated. This gating strategy was used in Figure 4b. (C) Representative T cell gating strategy for the tumors of PyMT-mChOVA tumor-bearing mice. This gating strategy was used in Figure 4C and D.

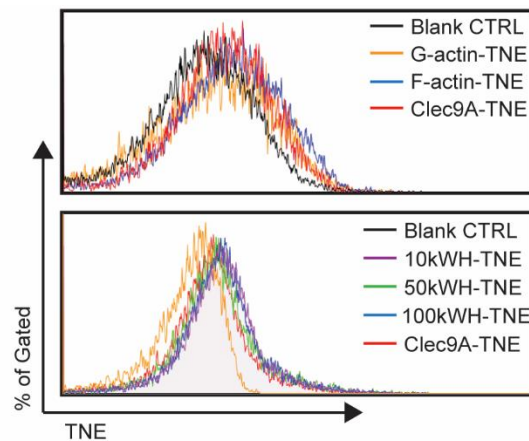

**Supp. Figure 6. In vivo specificity of Clec9A targeting TNE.**

Same experiment as in Fig. 4E, histograms show actin-functionalized TNE (upper panel) and WH peptide-functionalized TNE (lower panel) binding and uptake by CD8+ cDCs.

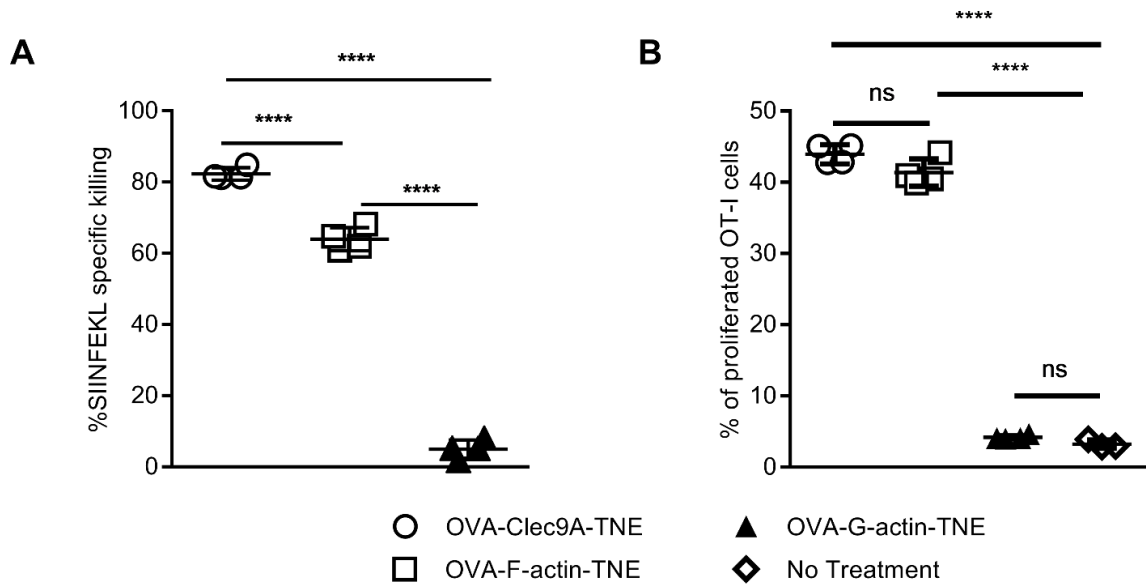

**Supp. Figure 7. OVA delivered by F-actin-TNE induced antigen specific killing and T cell response.**

(A) C57BL/6 mice were adoptively transferred with equal numbers of unpulsed CTV<sup>low</sup> and SIINFEKL-pulsed CTV<sup>high</sup> target cells 6 days after i.v. injection with OVA-Clec9A-TNE, OVA-F-actin-TNE or OVA-G-actin-TNE. The percentage of SIINFEKL peptide-specific lysis in spleen is depicted (n=5). (B) CTV-labeled spleen cells from OT-I transgenic mice were transferred to C57BL/6 mice. One day later these mice were injected i.v. with 200  $\mu$ l of OVA-Clec9A-TNE, OVA-G-actin-TNE or OVA-F-actin-TNE (formulated with 5  $\mu$ g of OVA). Six days later, Spleens were removed and cell suspensions stained with anti-CD3 and CD8 were analyzed by flow cytometry. CD3<sup>+</sup>CD8<sup>+</sup>CTV<sup>+</sup> cells were gated (n=4).
